# Supplementary material for: A zebrafish reporter line reveals immune and neuronal expression of endogenous retrovirus
Source: Oxford University Press journal article supplement (doi:10.1242/dmm.048921), 2022-02-10
Supplement: dmm048921supp.pdf [file dmm048921supp.pdf]

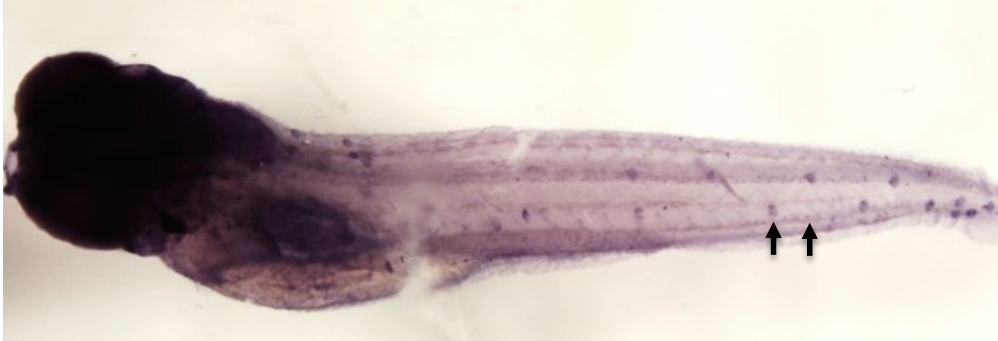

**Fig. S1.** Long development of the *env* probe from *zferv1a* by ISH revealed labelling of neuromasts (Black arrows).

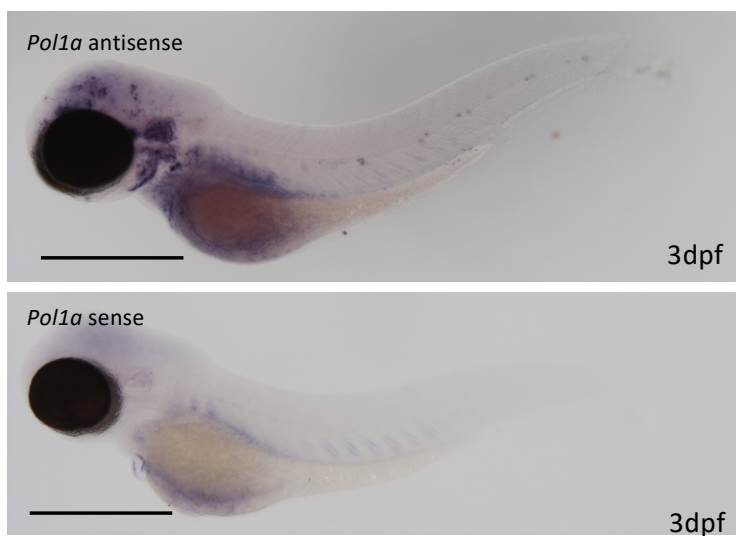

**Fig. S2.** Expression of the reverse transcriptase gene (*pol*) of *zferv1a* (called *pol1a* here) by *in situ* hybridisation at 3dpf. Scale bar 500 $\mu$ m.

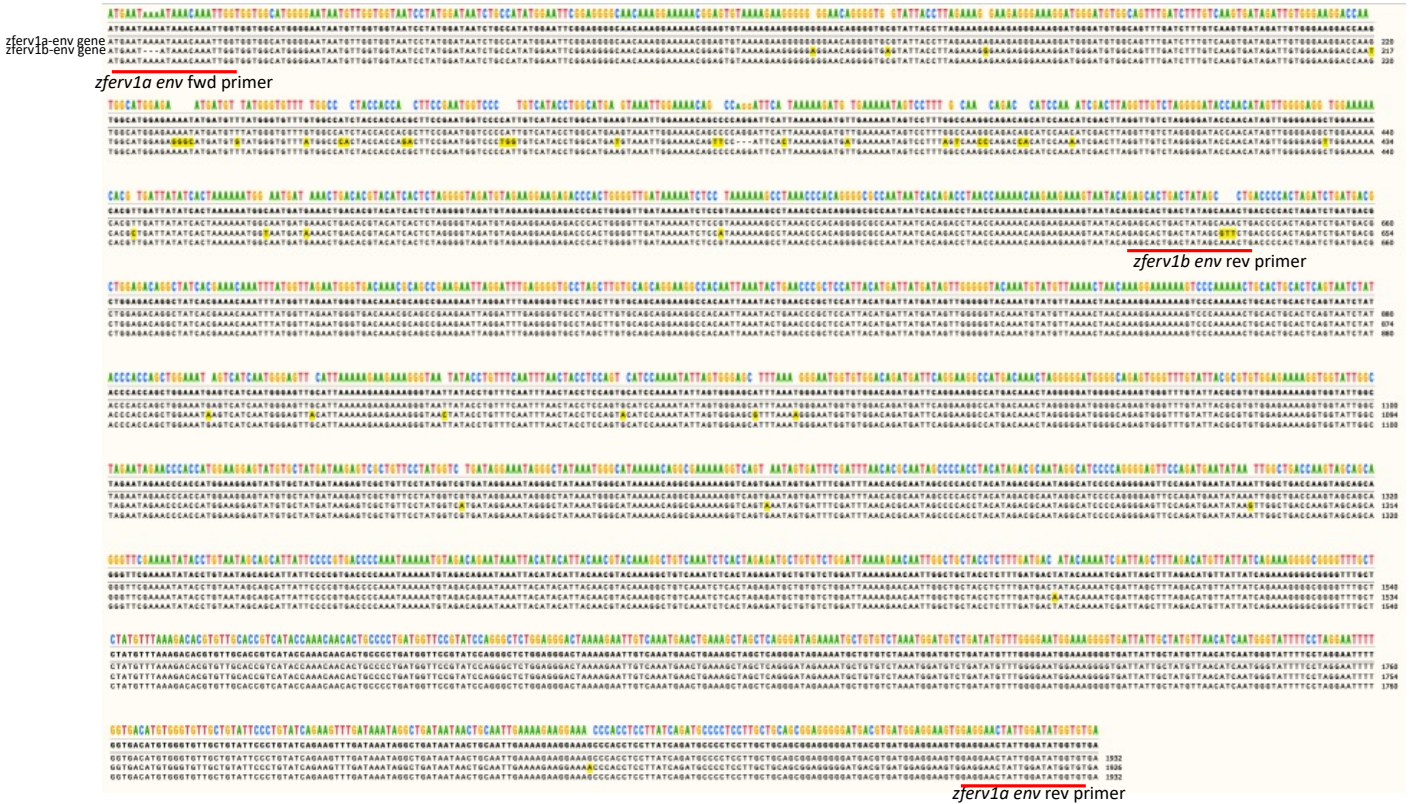

**Fig. S3.** Alignment of the envelope gene from *zferfv1a* and *zferfv1b* to highlight to regions with significant differences between the two genes. Primers used to design the probes are underlined in red.

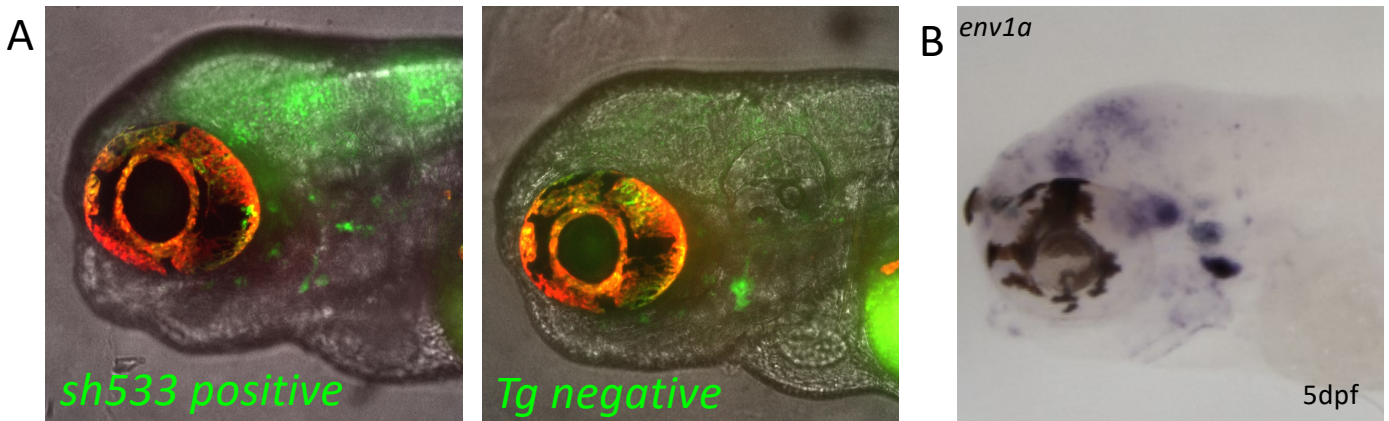

**Fig. S4.** **A.** *sh533* positive and negative embryo illuminated with the GFP and mCherry laser to highlight the similar light reflection in the lenses that act as mirrors. **B.** ISH with RNA probe *env1a* in a 5dpf embryos injected with a crRNA against the tyrosinase gene generating a mosaic pattern of pigment in the eye

A: Non transgenic control

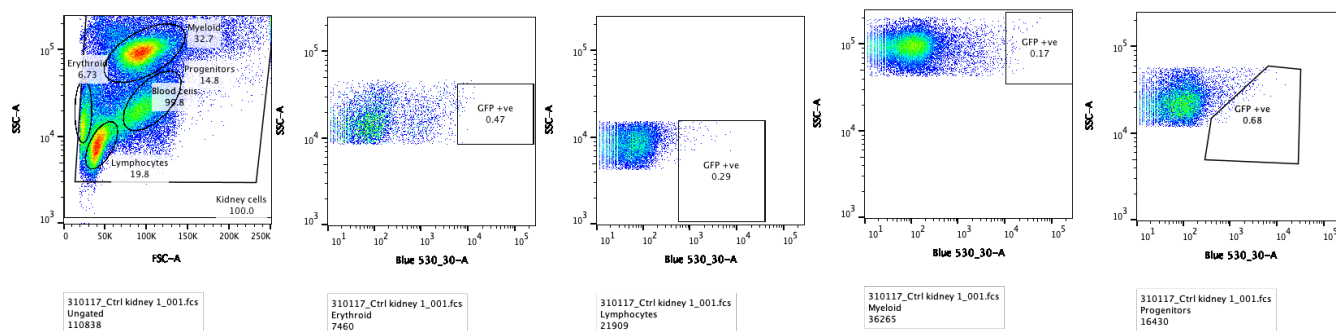

B: *sh533*

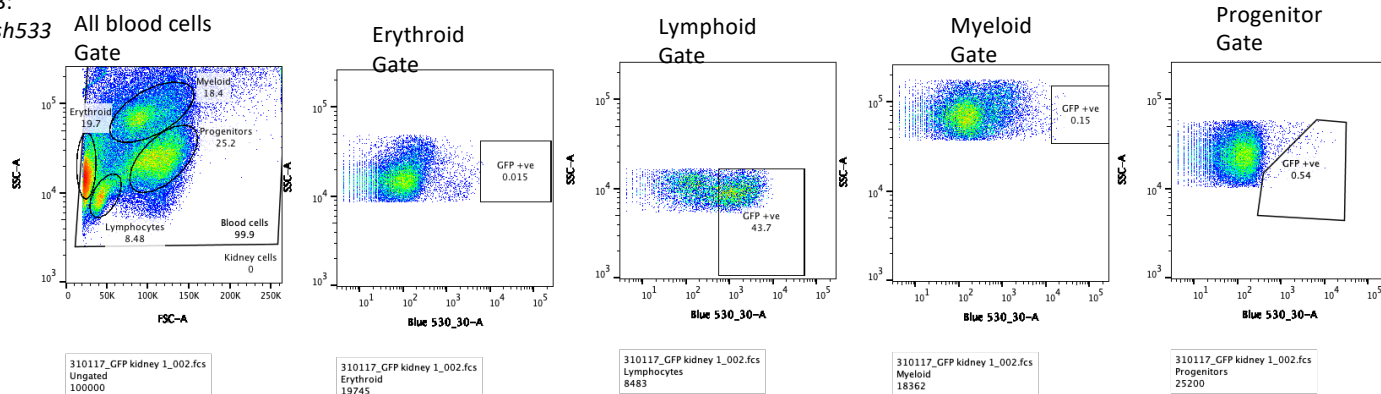

**Fig. S5.** Gating strategy for each hematopoietic lineage (erythroid, lymphoid, myeloid and progenitor) drawn first in non transgenic control (A) and applied to the *sh533* transgenic kidney samples.

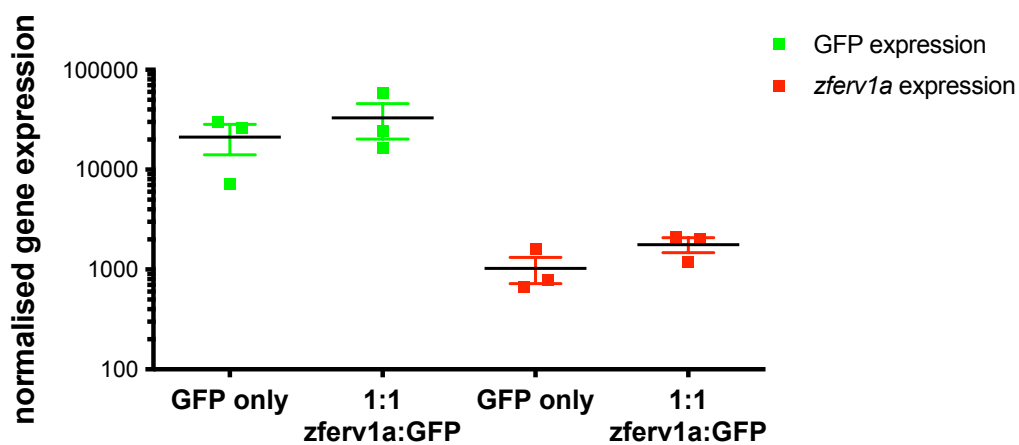

**Fig. S6.** Expression of GFP (green) and *zfer1a* (red) by qPCR after 1-cell stage injection of a GFP expressing vector alone (GFP only) or in equimolar concentration with *zfer1a* expression vector (1:1 *zfer1a*:GFP).

**Table S1.** Coordinates of the *zferv1-7* genomic segments

| ERV name       | chromosome (scaffold)       | orientation | 5' limit   | 3' limit   |
|----------------|-----------------------------|-------------|------------|------------|
| <i>zferv1a</i> | 4                           | reverse     | 62,546,461 | 62,557,677 |
| <i>zferv1b</i> | KN149691.1 - NW_001884427.4 | forward     | 211.988    | 223.087    |
| <i>zferv2</i>  | 7                           | reverse     | 19,379,508 | 19,389,176 |
| <i>zferv3</i>  | 16                          | reverse     | 9,986,975  | 9,996,169  |
| <i>zferv4</i>  | 5 - NW_018394575            | reverse     | 168.525    | 178.11     |
| <i>zferv5</i>  | 15                          | forward     | 44,144,056 | 44,162,279 |
| <i>zferv6</i>  | 7 - NW_018394672            | reverse     | 116.062    | 124.356    |
| <i>zferv7</i>  | 19                          | forward     | 7,960,461  | 7,968,734  |

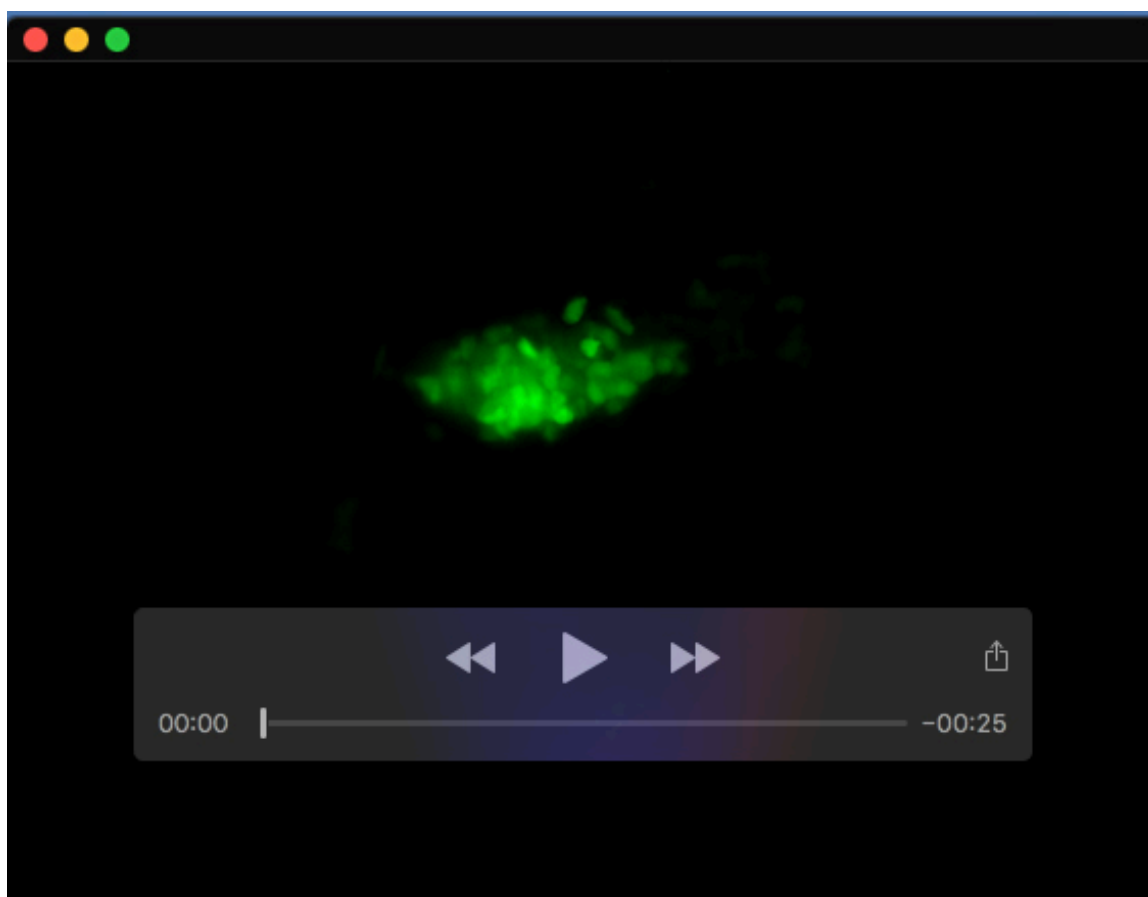

**Movie 1.** Timelapse using lightsheet microscopy of *sh533* transgenic embryos at 5dpf, duration 1h30 every 50sec as fast as possible. 215um stack every 1um slice.
